# Supplementary material
Source: HighWire-hosted journal article supplement (https://bmjopen.bmj.com/content/13/2/e068484)
Supplement: inline-supplementary-material-2 [file inline-supplementary-material-2.pdf]

**Supplemental material:****Full results**

| Human Resources Performances                                              | Yes, N (%)                            |             | No, N (%)                                                   |             |
|---------------------------------------------------------------------------|---------------------------------------|-------------|-------------------------------------------------------------|-------------|
|                                                                           | Higher level                          | Lower level | Higher level                                                | Lower level |
| <b>EMERGENCY CARE CLINICAL PROVIDERS</b>                                  |                                       |             |                                                             |             |
| Core of fixed providers permanently assigned to the emergency unit        | 2 (100.0)                             | 2 (22.2)    | 0 (0.0)                                                     | 7 (77.8)    |
|                                                                           | <b>Average Number of Providers, N</b> |             | <b>Average Number of Licensed or Certified Providers, N</b> |             |
|                                                                           | Higher level                          | Lower level | Higher level                                                | Lower level |
| <b>Number of <u>non-rotating</u> providers assigned to emergency unit</b> |                                       |             |                                                             |             |
| Nurses/nurse midwives                                                     | 25.5                                  | 1.6         | 18.0                                                        | 1.6         |
| Mid-level provider or advance practice nurses                             | 3.5                                   | 0.4         | 3.5                                                         | 0.4         |
| Doctors without specialist training                                       | 12.0                                  | 0.8         | 10.5                                                        | 0.8         |
| Emergency medicine specialists                                            | 1.5                                   | 0.0         | 1.5                                                         | 0.0         |
| Other specialist doctor                                                   | 0.0                                   | 0.1         | 0.0                                                         | 0.1         |
| <b>Number of <u>rotating</u> providers assigned to emergency unit</b>     |                                       |             |                                                             |             |

|                                                     |                 |             |                          |             |                              |             |
|-----------------------------------------------------|-----------------|-------------|--------------------------|-------------|------------------------------|-------------|
| Nurses/nurse midwives                               | 0.5             | 14.1        | 0.0                      | 14.1        |                              |             |
| Mid-level provider or advance practice nurses       | 0.0             | 9.2         | 0.0                      | 9.2         |                              |             |
| Doctors without specialist training                 | 7.0             | 5.7         | 0                        | 5.7         |                              |             |
| Emergency medicine specialists                      | 0.0             | 0.0         | 0.0                      | 0.0         |                              |             |
| Other specialist doctor                             | 0.0             | 0.0         | 0.0                      | 0.0         |                              |             |
| CONSULTING SERVICES AVAILABLE TO THE EMERGENCY UNIT |                 |             |                          |             |                              |             |
|                                                     | Adequate, N (%) |             | Some Availability, N (%) |             | Generally unavailable, N (%) |             |
|                                                     | Higher level    | Lower level | Higher level             | Lower level | Higher level                 | Lower level |
| Consulting Service                                  |                 |             |                          |             |                              |             |
| General Surgery                                     | 2 (100.0)       | 4 (44.4)    | 0 (0.0)                  | 3 (33.3)    | 0 (0.0)                      | 2 (22.2)    |
| OB/GYN                                              | 2 (100.0)       | 3 (33.3)    | 0 (0.0)                  | 2 (22.2)    | 0 (0.0)                      | 4 (44.4)    |
| Orthopaedics                                        | 2 (100.0)       | 4 (44.4)    | 0 (0.0)                  | 3 (33.3)    | 0 (0.0)                      | 2 (22.2)    |
| Anaesthesia                                         | 0 (0.0)         | 0 (0.0)     | 2 (100.0)                | 8 (88.9)    | 0 (0.0)                      | 1 (11.1)    |
| Paediatrics                                         | 2 (100.0)       | 1 (11.1)    | 0 (0.0)                  | 2 (22.2)    | 0 (0.0)                      | 6 (66.7)    |
| Psychiatry                                          | 1 (50.0)        | 2 (22.2)    | 1 (50.0)                 | 2 (22.2)    | 0 (0.0)                      | 5 (55.6)    |
| Other Specialty                                     | 1 (50.0)        | 3 (33.3)    | 1 (50.0)                 | 4 (44.4)    | 0 (0.0)                      | 2 (22.2)    |

| Clinical Services Performances                                                                                                                     | Average Proportion |             | Don't Know, N |             |                |             |
|----------------------------------------------------------------------------------------------------------------------------------------------------|--------------------|-------------|---------------|-------------|----------------|-------------|
|                                                                                                                                                    | Higher level       | Lower level | Higher level  |             | Lower level    |             |
| ACCESS                                                                                                                                             |                    |             |               |             |                |             |
| Proportion of patients with emergency conditions brought to the facility by ambulance with formally trained prehospital care providers             | 0.325              | 0.065       | N/A           |             | 1 facility     |             |
|                                                                                                                                                    | Yes, N (%)         |             | No, N (%)     |             | No Data, N (%) |             |
|                                                                                                                                                    | Higher level       | Lower level | Higher level  | Lower level | Higher level   | Lower level |
| Presence of regulations and/or protocols mandating that acutely ill or injured patients are clinically triaged prior to being required to register | 2 (100.0)          | 7 (77.8)    | 0 (0.0)       | 1 (11.1)    | 0 (0.0)        | 1 (11.1)    |
| Requirement of payment prior to provision of initial emergency care                                                                                | 0 (0.0)            | 2 (22.2)    | 2 (100.0)     | 7 (77.8)    | 0 (0.0)        | 0 (0.0)     |
| Presence of an electronic system for registration                                                                                                  | 2 (100.0)          | 8 (88.9)    | 0 (0.0)       | 1 (11.1)    | 0 (0.0)        | 0 (0.0)     |
| TRIAGE                                                                                                                                             |                    |             |               |             |                |             |
| Vital signs measured in triage area                                                                                                                | 2 (100.0)          | 9 (100.0)   | 0 (0.0)       | 0 (10.0)    | 0 (0.0)        | 0 (0.0)     |
| Formal triage system                                                                                                                               | 1 (50.0)           | 5 (55.6)    | 1 (50.0)      | 4 (44.4)    | 0 (0.0)        | 0 (0.0)     |

|                                                                                                           |              |             |              |          |             |          |
|-----------------------------------------------------------------------------------------------------------|--------------|-------------|--------------|----------|-------------|----------|
| Time targets for each triage category                                                                     | 1 (50.0)     | 2 (22.2)    | 0 (0.0)      | 3 (33.3) | 1 (50.0)    | 4 (44.4) |
| Regular tracking of compliance with time targets                                                          | 0 (0.0)      | 2 (22.2)    | 0 (0.0)      | 1 (11.1) | 2 (100.0)   | 6 (66.7) |
| Specific triage protocols for children <5 years of age                                                    | 0 (0.0)      | 1 (11.1)    | 1 (50.0)     | 4 (44.4) | 1 (50.0)    | 4 (44.4) |
| Specific triage protocols for pregnant women                                                              | 0 (0.0)      | 0 (0.0)     | 1 (50.0)     | 5 (55.6) | 1 (50.0)    | 4 (44.4) |
| GUIDELINES, PROTOCOLS, AND CHECKLISTS                                                                     |              |             |              |          |             |          |
|                                                                                                           | Yes, N (%)   |             | No, N (%)    |          |             |          |
|                                                                                                           | Higher level | Lower level | Higher level |          | Lower level |          |
| Written protocols                                                                                         |              |             |              |          |             |          |
| Presence of any written protocols.                                                                        | 2 (100.0)    | 9 (100.0)   | 0 (0.0)      |          | 0 (0.0)     |          |
|                                                                                                           | Yes          |             | No           |          |             |          |
|                                                                                                           | Higher level | Lower level | Higher level |          | Lower level |          |
| Protocol for systematic triage that ensures patients are seen in order of acuity                          | 2 (100.0)    | 7 (77.8)    | 0 (0.0)      |          | 2 (22.2)    |          |
| Syndromic surveillance guidelines with links to public health officials for case definition and reporting | 2 (100.0)    | 8 (88.9)    | 0 (0.0)      |          | 1 (11.1)    |          |

|                                                                                                     |                     |                    |                     |                    |
|-----------------------------------------------------------------------------------------------------|---------------------|--------------------|---------------------|--------------------|
| Clear protocol for communication with hospital administration during times of overcrowding          | 0 (0.0)             | 4 (44.4)           | 2 (100.0)           | 5 (55.6)           |
| Emergency-unit-specific emergency response protocol, including protocol for mass casualty incidents | 1 (50.0)            | 4 (44.4)           | 1 (50.0)            | 5 (55.6)           |
| <b>Clinical management protocols</b>                                                                |                     |                    |                     |                    |
| Protocol for initial approach to ABCDs (airway, breathing, circulation, basic neurologic function)  | 2 (100.0)           | 7 (77.8)           | 0 (0.0)             | 2 (22.2)           |
| Trauma care checklist                                                                               | 1 (50.0)            | 0 (0.0)            | 1 (50.0)            | 9 (100.0)          |
| Medical resuscitation checklist                                                                     | 1 (50.0)            | 4 (44.4)           | 1 (50.0)            | 5 (55.6)           |
| Protocol for neonatal resuscitation                                                                 | 0 (0.0)             | 6 (66.7)           | 2 (100.0)           | 3 (44.4)           |
| Protocol for volume resuscitation of children and adults                                            | 2 (100.0)           | 6 (66.7)           | 0 (0.0)             | 3 (33.3)           |
| Protocol for adjusting interventions for malnourished patients                                      | 2 (100.0)           | 5 (55.6)           | 0 (0.0)             | 4 (44.4)           |
| Protocol for post-exposure prevention of STI/HIV, emergency contraception, and counselling          | 2 (100.0)           | 8 (88.9)           | 0 (0.0)             | 1 (11.1)           |
| Protocol for management of labour and delivery in low risk women                                    | 1 (50.0)            | 7 (77.8)           | 1 (50.0)            | 2 (22.2)           |
|                                                                                                     | <b>Yes, N (%)</b>   |                    | <b>No, N (%)</b>    |                    |
|                                                                                                     | <b>Higher level</b> | <b>Lower level</b> | <b>Higher level</b> | <b>Lower level</b> |

| <b>Condition-specific management protocols</b>                                   |              |             |          |          |
|----------------------------------------------------------------------------------|--------------|-------------|----------|----------|
| Asthma exacerbation                                                              | 2<br>(100.0) | 6 (66.7)    | 0 (0.0)  | 3 (33.3) |
| Pneumonia                                                                        | 2<br>(100.0) | 6 (66.7)    | 0 (0.0)  | 3 (33.3) |
| Maternal haemorrhage                                                             | 1 (50.0)     | 7 (77.8)    | 2 (50.0) | 2 (22.2) |
| Sepsis                                                                           | 1 (50.0)     | 4<br>(44.4) | 1 (50.0) | 5 (55.6) |
| Diabetic ketoacidosis                                                            | 2<br>(100.0) | 5 (55.6)    | 0 (0.0)  | 4 (44.4) |
| Other condition                                                                  | 2<br>(100.0) | 6 (66.7)    | 0 (0.0)  | 3 (33.3) |
| <b>Admission or discharge protocols</b>                                          |              |             |          |          |
| Acuity-based internal transfer protocols to OR or ICU                            | 1 (50.0)     | 3 (33.3)    | 1 (50.0) | 6 (66.7) |
| Protocol for timely disposition from the emergency unit                          | 2<br>(100.0) | 4 (44.4)    | 0 (0.0)  | 5 (55.6) |
| Protocol for conveying information about discharge or disposition to the patient | 2<br>(100.0) | 8<br>(88.9) | 0 (0.0)  | 1 (11.1) |
| Hand-over protocols when transferring patients from one care provider to another | 2<br>(100.0) | 6 (66.7)    | 0 (0.0)  | 3 (33.3) |
| <b>Outside transfer protocols</b>                                                |              |             |          |          |
| Condition-specific transfer or referral protocols                                | 1 (50.0)     | 6 (66.7)    | 1 (50.0) | 3 (33.3) |

|                                                                                                                                                     |           |           |           |          |
|-----------------------------------------------------------------------------------------------------------------------------------------------------|-----------|-----------|-----------|----------|
| Communication with receiving facility prior to transfer of patients with emergency conditions                                                       | 1 (50.0)  | 9 (100.0) | 1 (50.0)  | 0 (0.0)  |
| <b>Safety protocols</b>                                                                                                                             |           |           |           |          |
| Infection prevention and control protocols                                                                                                          | 2 (100.0) | 9 (100.0) | 0 (0.0)   | 0 (0.0)  |
| Protocol for post exposure prophylaxis for health care workers                                                                                      | 2 (100.0) | 8 (88.9)  | 0 (0.0)   | 1 (11.1) |
| Security protocols to protect staff, patients, and infrastructure from violence.                                                                    | 0 (0.0)   | 6 (66.7)  | 2 (100.0) | 3 (33.3) |
| Protocol for managing hazardous exposures (including designated decontamination area)                                                               | 0 (0.0)   | 3 (33.3)  | 2 (100.0) | 6 (66.7) |
| Containment and disposal of sharps and biomedical waste                                                                                             | 2 (100.0) | 9 (100.0) | 0 (0.0)   | 0 (0.0)  |
| Plan to ensure emergency unit staff and patient safety if an incident occurs within the emergency unit (including space, transport, communications) | 0 (0.0)   | 4 (44.4)  | 2 (100.0) | 5 (55.6) |
| <b>QUALITY IMPROVEMENT IN THE EMERGENCY UNIT</b>                                                                                                    |           |           |           |          |
| Systematic process for collecting patient data that links condition, management and outcomes (e.g., trauma registry)                                | 2 (100.0) | 4 (44.4)  | 0 (0.0)   | 5 (55.6) |
| Regular meetings convened to use clinical data for quality improvement (e.g., morbidity and mortality conferences, preventable death panels)        | 2 (100.0) | 9 (100.0) | 0 (0.0)   | 0 (0.0)  |

|                                                                                                                                            |              |              |              |             |                |             |
|--------------------------------------------------------------------------------------------------------------------------------------------|--------------|--------------|--------------|-------------|----------------|-------------|
| Tracking (e.g., clinical audit) to ensure that quality improvement actions (e.g., corrective action) are implemented after review meetings | 2<br>(100.0) | 9<br>(100.0) | 0 (0.0)      |             | 0 (0.0)        |             |
| Clinical document template (e.g., standardised clinical chart)                                                                             | 2<br>(100.0) | 7 (77.8)     | 0 (0.0)      |             | 2 (22.2)       |             |
| Visit to this emergency facility by a supervisor from outside the facility within the last 6 months                                        | 2<br>(100.0) | 8 (88.9)     | 0 (0.0)      |             | 1 (11.1)       |             |
| Documentation from the most recent external supervisory visit                                                                              | 2<br>(100.0) | 8 (88.9)     | 0 (0.0)      |             | 1 (11.1)       |             |
|                                                                                                                                            | Yes, N (%)   |              | No, N (%)    |             | No Data, N (%) |             |
|                                                                                                                                            | Higher level | Lower level  | Higher level | Lower level | Higher level   | Lower level |
| Document provides feedback or comments on some aspect of emergency services                                                                | 2<br>(100.0) | 8 (88.9)     | 0 (0.0)      | 0 (0.0)     | 0 (0.0)        | 1<br>(11.1) |

| <b>Signal Function Performances</b>   | <b>Adequate, N (%)</b> |              | <b>Some Availability, N (%)</b> |             | <b>Generally unavailable, N (%)</b> |             |
|---------------------------------------|------------------------|--------------|---------------------------------|-------------|-------------------------------------|-------------|
|                                       | Higher level           | Lower level  | Higher level                    | Lower level | Higher level                        | Lower level |
| <b>VITAL SIGNS, AIRWAY, BREATHING</b> |                        |              |                                 |             |                                     |             |
| <b>Vital signs</b>                    |                        |              |                                 |             |                                     |             |
| Vital signs triage area               | 1 (50.0)               | 9<br>(100.0) | 1 (50.0)                        | 0 (0.0)     | 0 (0.0)                             | 0 (0.0)     |
| Vital signs emergency unit            | 1 (50.0)               | 8 (88.9)     | 1 (50.0)                        | 1 (11.1)    | 0 (0.0)                             | 0 (0.0)     |



| <b>Airway</b>                                     |           |          |           |          |           |          |
|---------------------------------------------------|-----------|----------|-----------|----------|-----------|----------|
| Manual airway manoeuvres                          | 0 (0.0)   | 6 (66.7) | 2 (100.0) | 3 (33.3) | 0 (0.0)   | 0 (0.0)  |
| Use of suction                                    | 1 (50.0)  | 2 (22.2) | 1 (50.0)  | 7 (77.8) | 0 (0.0)   | 0 (0.0)  |
| Placement of oro- or nasopharyngeal airway device | 1 (50.0)  | 6 (66.7) | 1 (50.0)  | 2 (22.2) | 0 (0.0)   | 1 (11.1) |
| Placement of supraglottic device                  | 0 (0.0)   | 1 (11.1) | 0 (0.0)   | 4 (44.4) | 2 (100.0) | 4 (44.4) |
| Endotracheal intubation                           | 2 (100.0) | 3 (33.3) | 0 (0.0)   | 4 (44.4) | 0 (0.0)   | 2 (22.2) |
| Creation of surgical airway                       | 0 (0.0)   | 0 (0.0)  | 0 (0.0)   | 1 (11.1) | 2 (100.0) | 8 (88.9) |
| <b>Breathing</b>                                  |           |          |           |          |           |          |
| Saturation measured at triage                     | 1 (50.0)  | 8 (88.9) | 1 (50.0)  | 1 (11.1) | 0 (0.0)   | 0 (0.0)  |
| Saturation measured in emergency unit             | 1 (50.0)  | 7 (77.8) | 1 (50.0)  | 2 (22.2) | 0 (0.0)   | 0 (0.0)  |
| Bronchodilator administered                       | 1 (50.0)  | 4 (44.4) | 1 (50.0)  | 3 (33.3) | 0 (0.0)   | 2 (22.2) |
| Administration of oxygen                          | 2 (100.0) | 8 (88.9) | 0 (0.0)   | 1 (11.1) | 0 (0.0)   | 0 (0.0)  |
| Ventilation with BVM                              | 1 (50.0)  | 8 (88.9) | 1 (50.0)  | 0 (0.0)  | 0 (0.0)   | 1 (10.0) |
| Non-invasive mechanical ventilation               | 0 (0.0)   | 1 (11.1) | 1 (50.0)  | 0 (0.0)  | 1 (50.0)  | 8 (88.9) |
| Invasive mechanical ventilation                   | 0 (0.0)   | 0 (0.0)  | 1 (50.0)  | 5 (55.6) | 1 (50.0)  | 4 (44.4) |
| Needle decompression of tension ptx               | 0 (0.0)   | 2 (22.2) | 1 (50.0)  | 1 (11.1) | 1 (50.0)  | 6 (66.7) |
| Placement of chest tube                           | 0 (0.0)   | 3 (33.3) | 2 (100.0) | 2 (22.2) | 0 (0.0)   | 4 (44.4) |
| <b>CIRCULATION INTERVENTIONS</b>                  |           |          |           |          |           |          |
| <b>Volume Resuscitation</b>                       |           |          |           |          |           |          |

|                                                                      |           |           |           |          |           |           |
|----------------------------------------------------------------------|-----------|-----------|-----------|----------|-----------|-----------|
| Administration of oral rehydration                                   | 1 (50.0)  | 9 (100.0) | 0 (0.0)   | 0 (0.0)  | 1 (50.0)  | 0 (0.0)   |
| Peripheral IV placement                                              | 2 (100.0) | 9 (100.0) | 0 (0.0)   | 0 (0.0)  | 0 (0.0)   | 0 (0.0)   |
| Intraosseous access                                                  | 0 (0.0)   | 0 (0.0)   | 2 (100.0) | 0 (0.0)  | 0 (0.0)   | 9 (100.0) |
| Venous cutdown                                                       | 0 (0.0)   | 5 (55.6)  | 1 (50.0)  | 2 (22.2) | 1 (50.0)  | 2 (22.2)  |
| Central venous line placement                                        | 0 (0.0)   | 2 (22.2)  | 1 (50.0)  | 6 (66.7) | 1 (50.0)  | 1 (11.1)  |
| IV fluid administration                                              | 2 (100.0) | 9 (100.0) | 0 (0.0)   | 0 (0.0)  | 0 (0.0)   | 0 (0.0)   |
| Adjustment of fluid resuscitation for malnutrition or severe anaemia | 2 (100.0) | 8 (88.9)  | 0 (0.0)   | 0 (0.0)  | 0 (0.0)   | 1 (11.1)  |
| Urinary catheter placement                                           | 2 (100.0) | 9 (100.0) | 0 (0.0)   | 0 (0.0)  | 0 (0.0)   | 0 (0.0)   |
| <b>Control of Bleeding</b>                                           |           |           |           |          |           |           |
| External control of haemorrhage                                      | 2 (100.0) | 9 (100.0) | 0 (0.0)   | 0 (0.0)  | 0 (0.0)   | 0 (0.0)   |
| Wound packing and/or suture to control bleeding                      | 2 (100.0) | 7 (77.8)  | 0 (0.0)   | 2 (22.2) | 0 (0.0)   | 0 (0.0)   |
| Tourniquet placement                                                 | 1 (50.0)  | 7 (77.8)  | 1 (50.0)  | 2 (22.2) | 0 (0.0)   | 0 (0.0)   |
| Pelvic binding placement                                             | 0 (0.0)   | 2 (22.2)  | 2 (100.0) | 3 (33.3) | 0 (0.0)   | 4 (44.4)  |
| Safe transfusion of blood performed                                  | 1 (50.0)  | 7 (77.8)  | 1 (50.0)  | 2 (22.2) | 0 (0.0)   | 0 (0.0)   |
| Point of care ultrasound performed                                   | 0 (0.0)   | 1 (11.1)  | 1 (50.0)  | 6 (66.7) | 1 (50.0)  | 2 (22.2)  |
| <b>Cardiac Interventions</b>                                         |           |           |           |          |           |           |
| Pericardiocentesis performed                                         | 0 (0.0)   | 0 (0.0)   | 0 (0.0)   | 0 (0.0)  | 2 (100.0) | 9 (100.0) |
| External defibrillation and/ or cardioversion performed              | 1 (50.0)  | 1 (11.1)  | 0 (0.0)   | 3 (33.3) | 1 (50.0)  | 5 (55.6)  |

|                                                          |           |           |          |          |           |           |
|----------------------------------------------------------|-----------|-----------|----------|----------|-----------|-----------|
| External cardiac pacing performed                        | 0 (0.0)   | 0 (0.0)   | 1 (50.0) | 2 (22.2) | 1 (50.0)  | 7 (77.8)  |
| Adrenaline available for administration                  | 2 (100.0) | 8 (88.9)  | 0 (0.0)  | 1 (11.1) | 0 (0.0)   | 0 (0.0)   |
| ECG performed and interpreted                            | 0 (0.0)   | 4 (44.4)  | 1 (50.0) | 3 (33.3) | 1 (50.0)  | 2 (22.2)  |
| Aspirin administered for ischemia                        | 2 (100.0) | 8 (88.9)  | 0 (0.0)  | 1 (11.1) | 0 (0.0)   | 0 (0.0)   |
| Thrombolytic administration for MI                       | 0 (0.0)   | 0 (0.0)   | 0 (0.0)  | 0 (0.0)  | 2 (100.0) | 9 (100.0) |
| <b>Unconscious Patient</b>                               |           |           |          |          |           |           |
| Point of care glucose testing for unconscious patients   | 2 (100.0) | 9 (100.0) | 0 (0.0)  | 0 (0.0)  | 0 (0.0)   | 0 (0.0)   |
| Glucose administered for hypoglycemia                    | 2 (100.0) | 9 (100.0) | 0 (0.0)  | 0 (0.0)  | 0 (0.0)   | 0 (0.0)   |
| Lumbar puncture performed in unconscious patient         | 0 (0.0)   | 3 (33.3)  | 0 (0.0)  | 4 (44.4) | 2 (100.0) | 2 (22.2)  |
| <b>Seizure</b>                                           |           |           |          |          |           |           |
| Protection from secondary injury of patient with seizure | 1 (50.0)  | 3 (33.3)  | 0 (0.0)  | 4 (44.4) | 1 (50.0)  | 2 (22.2)  |
| Benzodiazepine administered for seizure                  | 2 (100.0) | 9 (100.0) | 0 (0.0)  | 0 (0.0)  | 0 (0.0)   | 0 (0.0)   |
| IV Magnesium admin for eclampsia                         | 2 (100.0) | 8 (88.9)  | 0 (0.0)  | 1 (11.1) | 0 (0.0)   | 0 (0.0)   |
| <b>Other</b>                                             |           |           |          |          |           |           |
| Mental status examination performed                      | 2 (100.0) | 8 (88.9)  | 0 (0.0)  | 1 (11.1) | 0 (0.0)   | 0 (0.0)   |
| Management of extreme temperature                        | 1 (50.0)  | 2 (22.2)  | 0 (0.0)  | 3 (33.3) | 1 (50.0)  | 4 (44.4)  |
| Safe physical restraint performed when needed            | 1 (50.0)  | 7 (77.8)  | 1 (50.0) | 2 (22.2) | 0 (0.0)   | 0 (0.0)   |
| Medication administered for agitation                    | 1 (50.0)  | 8 (88.9)  | 1 (50.0) | 1 (11.1) | 0 (0.0)   | 0 (0.0)   |

|                                                                 |           |           |           |           |          |          |
|-----------------------------------------------------------------|-----------|-----------|-----------|-----------|----------|----------|
| Procedural sedation performed                                   | 1 (50.0)  | 2 (22.2)  | 1 (50.0)  | 6 (66.7)  | 0 (0.0)  | 1 (11.1) |
| Relevant antidote administered for toxic exposure               | 0 (0.0)   | 0 (0.0)   | 2 (100.0) | 9 (100.0) | 0 (0.0)  | 0 (0.0)  |
| <b>SEPSIS INTERVENTIONS</b>                                     |           |           |           |           |          |          |
| IV antibiotics administered when needed                         | 2 (100.0) | 8 (88.9)  | 0 (0.0)   | 1 (11.1)  | 0 (0.0)  | 0 (0.0)  |
| IV vasopressor administered                                     | 1 (50.0)  | 0 (0.0)   | 0 (0.0)   | 3 (33.3)  | 1 (50.0) | 6 (66.7) |
| Diagnostic paracentesis performed                               | 2 (100.0) | 8 (88.9)  | 0 (0.0)   | 1 (11.1)  | 0 (0.0)  | 0 (0.0)  |
| Bedside minor surgical techniques for infectious source control | 1 (50.0)  | 8 (88.9)  | 1 (50.0)  | 1 (11.1)  | 0 (0.0)  | 0 (0.0)  |
| <b>TRAUMA INTERVENTIONS</b>                                     |           |           |           |           |          |          |
| Cervical spine immobilisation performed after trauma            | 2 (100.0) | 4 (44.4)  | 0 (0.0)   | 3 (33.3)  | 0 (0.0)  | 2 (22.2) |
| Three-way dressing performed for sucking chest wound            | 0 (0.0)   | 0 (0.0)   | 1 (50.0)  | 1 (11.1)  | 1 (50.0) | 8 (88.9) |
| Fasciotomy or escharotomy performed for compartment syndrome    | 0 (0.0)   | 2 (22.2)  | 1 (50.0)  | 2 (22.2)  | 1 (50.0) | 5 (55.6) |
| Opiate analgesia administered                                   | 0 (0.0)   | 8 (88.9)  | 2 (100.0) | 0 (0.0)   | 0 (0.0)  | 1 (11.1) |
| Fractures immobilised                                           | 2 (100.0) | 9 (100.0) | 0 (0.0)   | 0 (0.0)   | 0 (0.0)  | 0 (0.0)  |
| Closed reduction of fracture or dislocation performed           | 0 (0.0)   | 6 (66.7)  | 2 (100.0) | 3 (33.3)  | 0 (0.0)  | 0 (0.0)  |
| Antibiotics administered for open fractures                     | 2 (100.0) | 8 (88.9)  | 0 (0.0)   | 1 (11.1)  | 0 (0.0)  | 0 (0.0)  |
| Initial wound care performance                                  | 2 (100.0) | 9 (100.0) | 0 (0.0)   | 0 (0.0)   | 0 (0.0)  | 0 (0.0)  |
| Tetanus vaccination or IVIg administered                        | 1 (50.0)  | 5 (55.6)  | 1 (50.0)  | 4 (44.4)  | 0 (0.0)  | 0 (0.0)  |

| OBSTETRIC INTERVENTIONS              |          |          |          |          |          |          |
|--------------------------------------|----------|----------|----------|----------|----------|----------|
| Emergency vaginal delivery performed | 1 (50.0) | 4 (44.4) | 1 (50.0) | 4 (44.4) | 0 (0.0)  | 1 (11.1) |
| Uterotonic drug administered         | 1 (50.0) | 4 (44.4) | 0 (0.0)  | 4 (44.4) | 1 (50.0) | 1 (11.1) |
| Neonatal resuscitation performed     | 0 (0.0)  | 3 (33.3) | 1 (50.0) | 4 (44.4) | 1 (50.0) | 2 (22.2) |
